# Supplementary figures and images for: Coupling of zygotic transcription to mitotic control at theDrosophilamid-blastula transition
Source: Oxford University Press journal article supplement (doi:10.1242/dev.034421), 2009-05-22

A

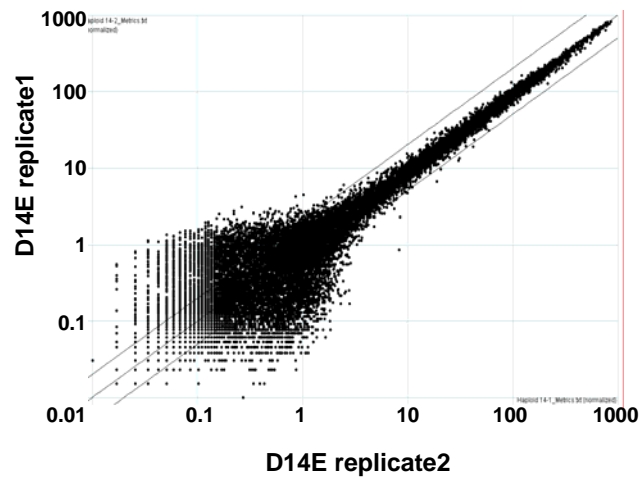

B

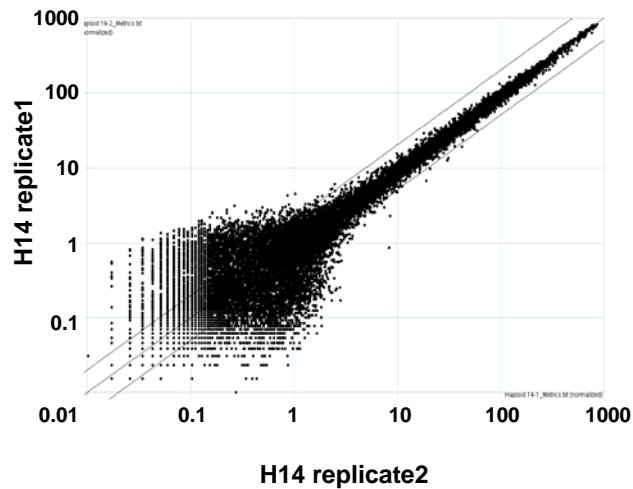

C

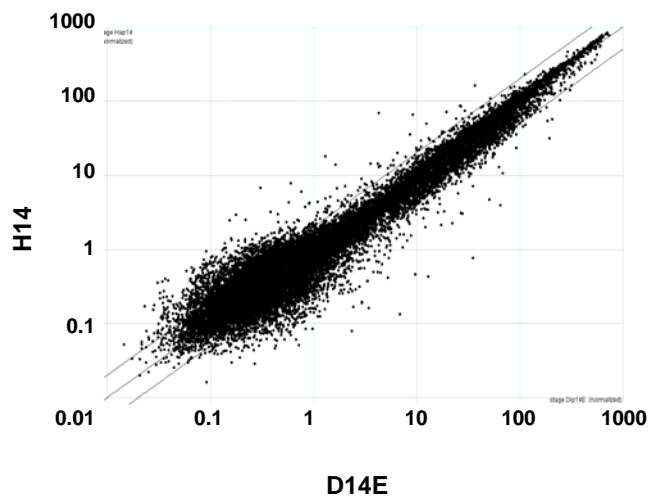

Supplement: dev034421-sup-034421-figs2.pdf [file dev034421-sup-034421-figs2.pdf]

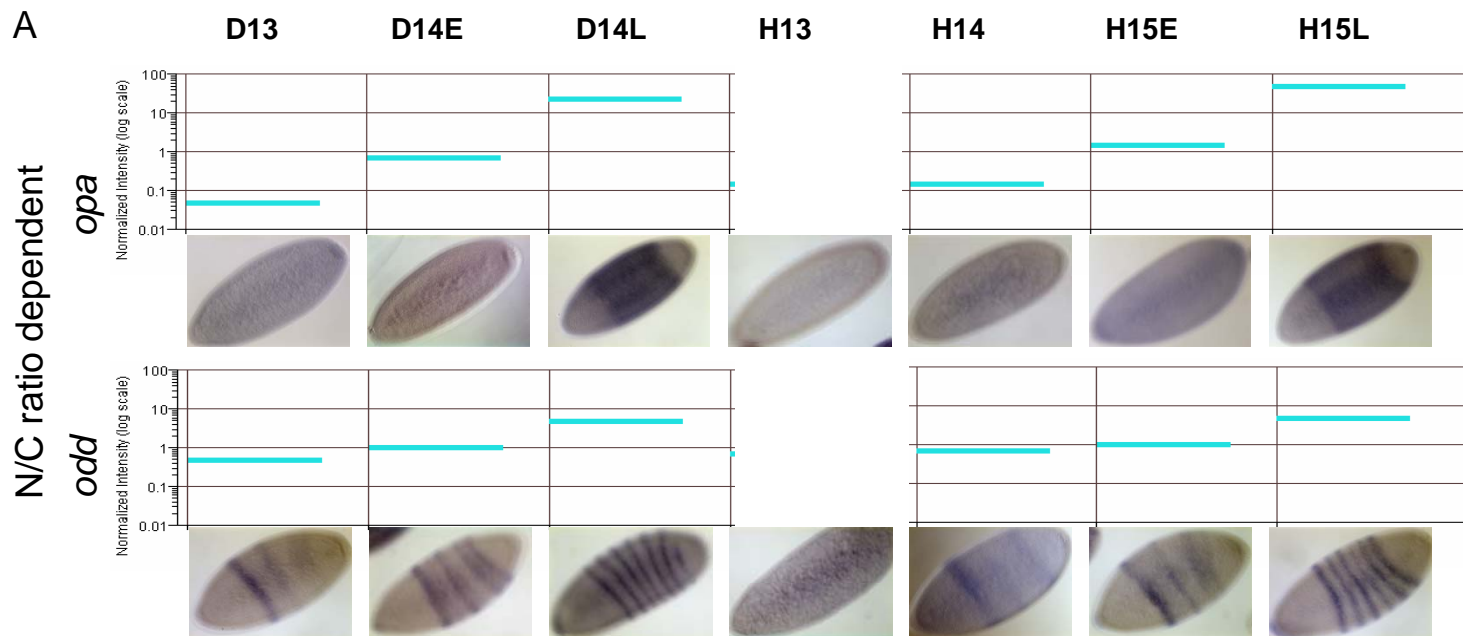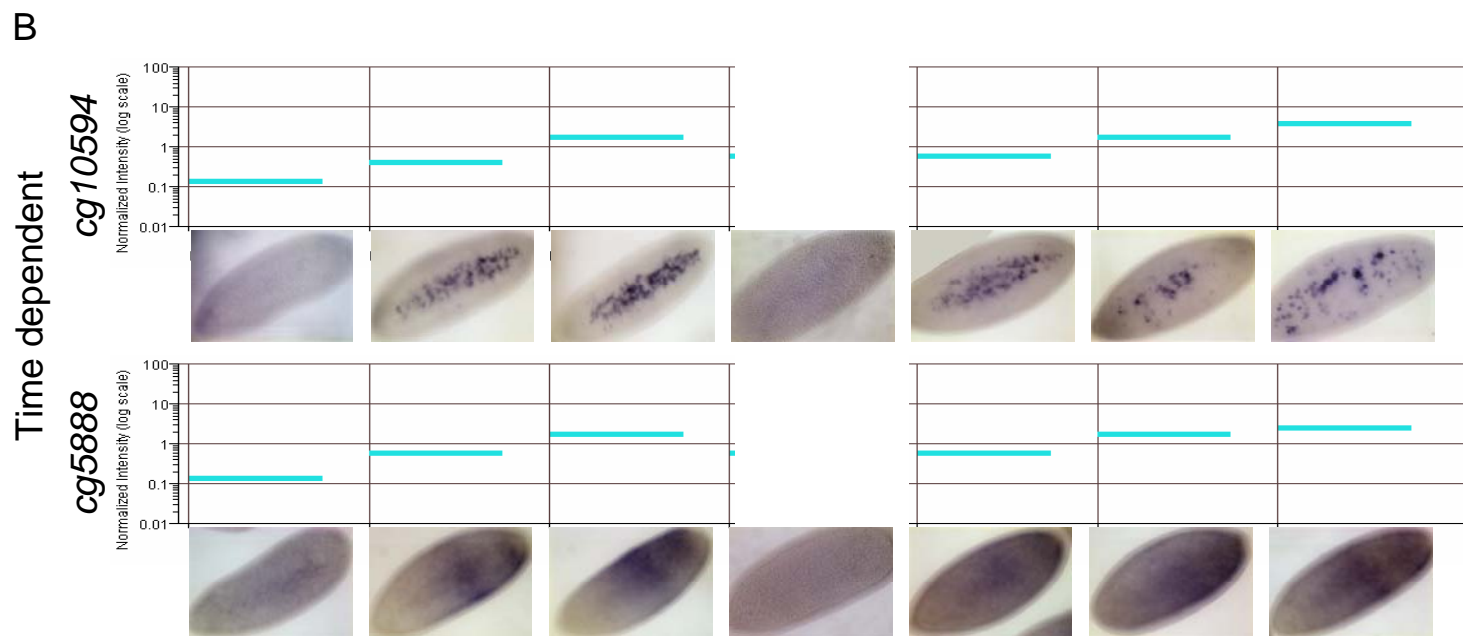

Supplement: dev034421-sup-034421-figs3.pdf [file dev034421-sup-034421-figs3.pdf]

A

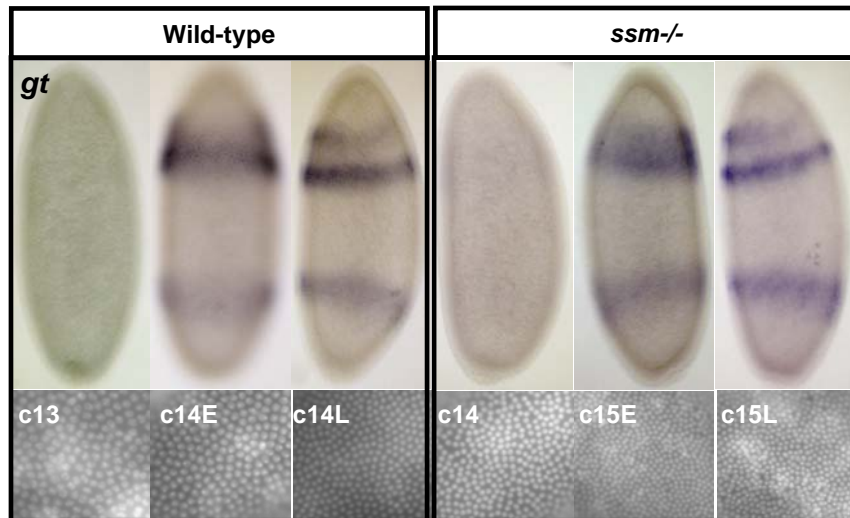

B

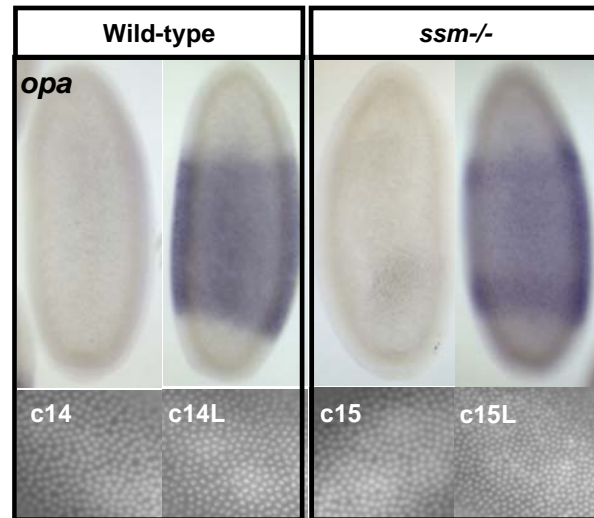

C

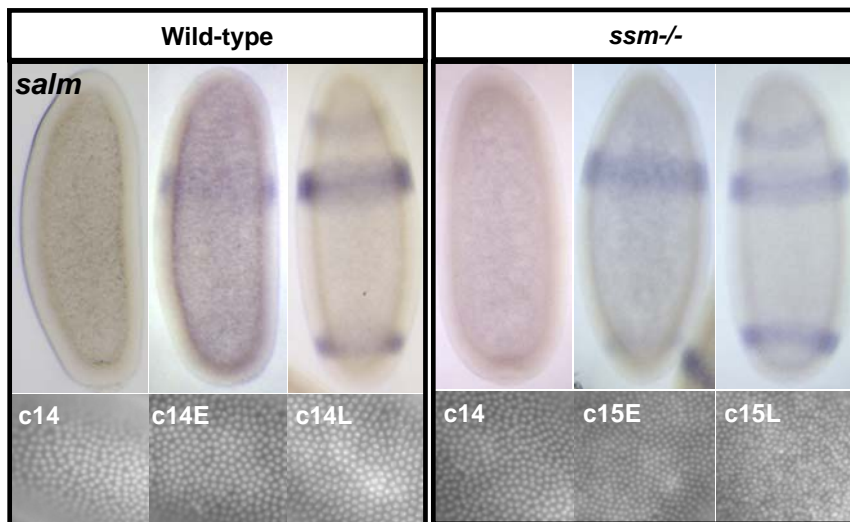

D

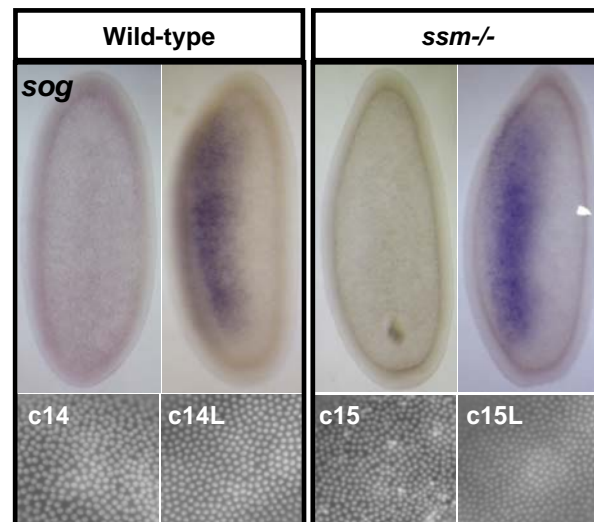

Supplement: dev034421-sup-034421-figs4.pdf [file dev034421-sup-034421-figs4.pdf]

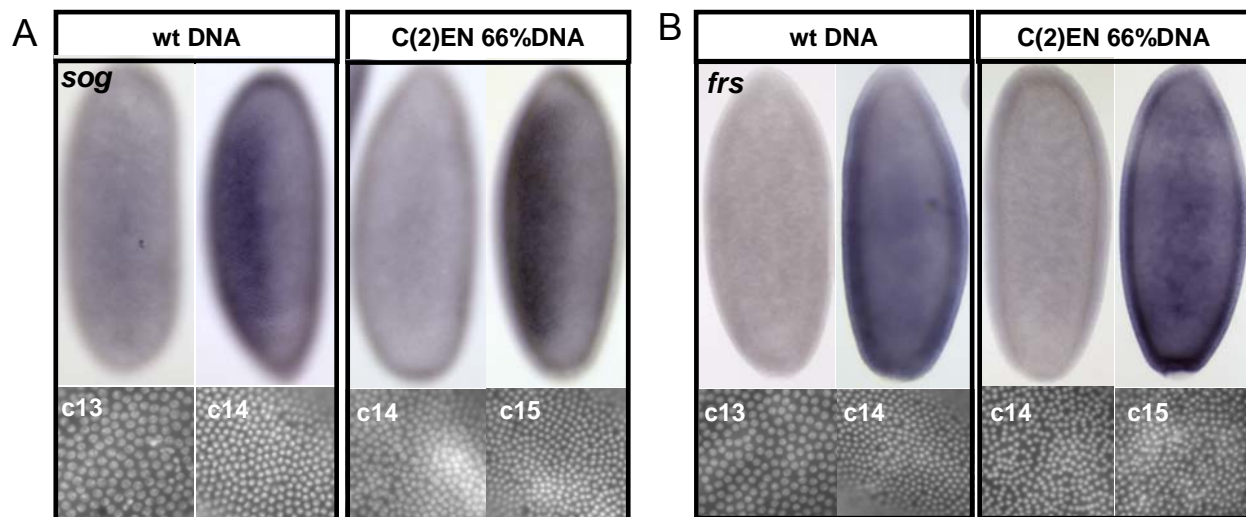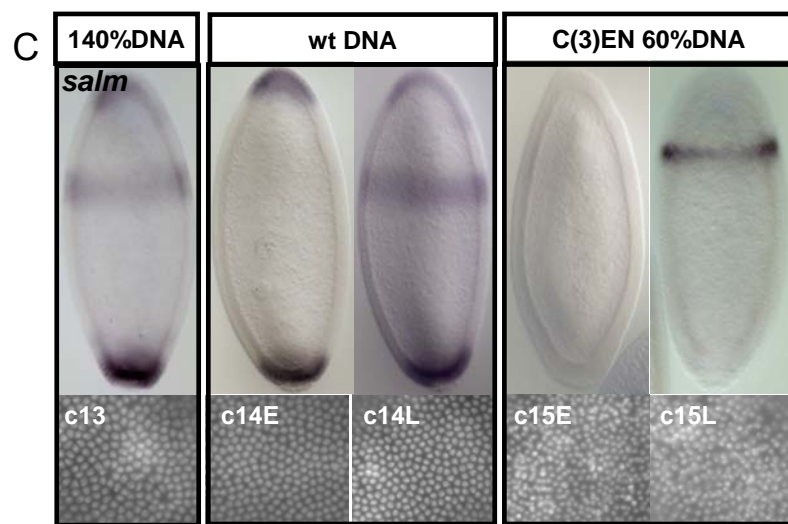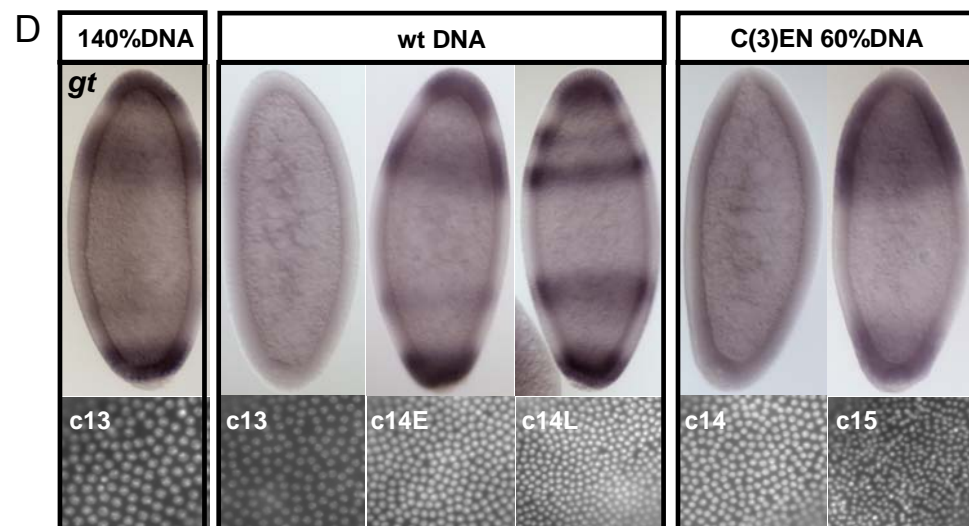

Supplement: dev034421-sup-034421-figs5.pdf [file dev034421-sup-034421-figs5.pdf]

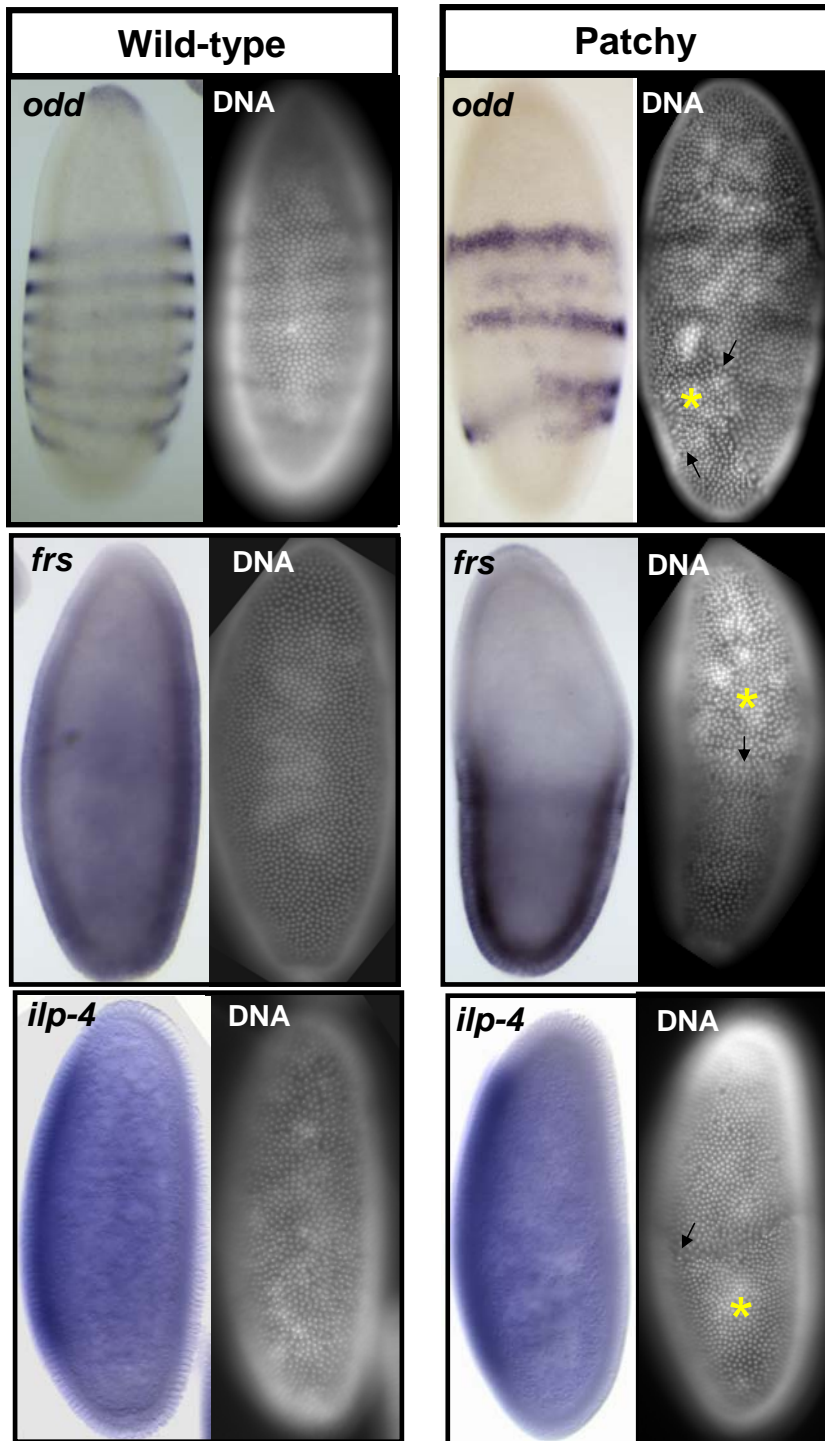

Supplement: dev034421-sup-034421-figs6.pdf [file dev034421-sup-034421-figs6.pdf]
